# Supplementary material
Source: PubMed Central journal article supplement (PMC3918513)
Supplement: NIHMS56433-supplement-supplementary_table_1.pdf [file NIHMS56433-supplement-supplementary_table_1.pdf]

**Supplementary Table S1.** Primers used for site-directed mutagenesis

| Primer name | Primer sequence (5'–3')                                               |
|-------------|-----------------------------------------------------------------------|
| P43-F       | GCTTGCAAAAACGTGGGCCGGTGAAACAGACCCTG                                   |
| P43-R       | CCCACGTTTTTGGCAAGCCAACCATTAGG                                         |
| E122G-F     | TGTCAAGGCGGCTTGTGGGGCAAAAAG                                           |
| E122G-R     | CACAAGCCGCCTTGAACACAGGCCAC                                            |
| PQ-F        | GCTTGCAAAAACGTGGGCAGGTGAAACAGACC                                      |
| PQ-R        | GCCCACGTTTTTGGCAAGCCAACCATTAGGG                                       |
| AvrII-F     | CCTGGCCCTGTCTTCTTGACGAGC                                              |
| IRES-3C-R   | CACTCTCCATATTATCATCGTGTTT                                             |
| IRES-3C-F   | CACGATGATAATATGGAG-AGTGGTGCTCC                                        |
| 3C-AgeI-R   | GACCGGTAGCCGGATCCTACTCGTGGTGT                                         |
| AgeI-R      | GTGCTGCCGTAATGCACTCTGGGG                                              |
| C163A-F     | GCCACCAAGGCGGGTTACGCTGGAGGAGCC                                        |
| C163A-R     | GTAACCCGCCTTGGTGGCAGCTTTGTAGG                                         |
| XbaI-F      | GACCATTGGGCCTCTAGAGAGTCC                                              |
| CprME-F     | AGTCTAGAGCTTGCCGCCACCATGGTCAAGAAGGCCATCCT                             |
| CprME-R     | GCTCTAGACTTGGCGGACTAGCATATGTCGTAGTCCATTCAGGTTC<br>CGCCCCACTCCAAGGGTCA |
| MluI-mut-F  | GACCGCAACGAAGACACGTCAACCCAGAGTC                                       |
| MluI-mut-R  | TCTTCGTTGCGGTCTCTTTCGACACTCGTC                                        |
